# Supplementary material
Source: publisher figshare collection journal article supplement (https://aacr.figshare.com/articles/dataset/_/22541261)
Supplement: Supplementary file 1 [file 40004633]

## Supplementary Figures

### IL27 signaling serves as an immunologic checkpoint for innate cytotoxic cells to promote hepatocellular carcinoma

Turan Aghayev<sup>1,#</sup>, Aleksandra M. Mazitova<sup>1, 2,#</sup>, Jennifer R. Fang<sup>3,#</sup>, Iuliia O. Peshkova<sup>1</sup>, Matthew Rausch<sup>4</sup>, Manhsin Hung<sup>5,6</sup>, Kerry F. White<sup>4</sup>, Ricard Masia<sup>4</sup>, Elizaveta K. Titerina<sup>1</sup>, Aliia R. Fatkhullina<sup>1</sup>, Isabelle Cousineau<sup>7</sup>, Simon Turcotte<sup>7</sup>, Dmitry Zhigarev<sup>1</sup>, Anastasiia Marchenko<sup>2</sup>, Svetlana Khoziainova<sup>2</sup>, Petr Makhov<sup>8</sup>, Yin Fei Tan<sup>9</sup>, Andrew V. Kossenkov<sup>10</sup>, David L. Wiest<sup>1</sup>, John Stagg<sup>7</sup>, Xin Wei Wang<sup>5,6</sup>, Kerry S. Campbell<sup>1</sup>, Amiran K. Dzutsev<sup>3</sup>, Giorgio Trinchieri<sup>3</sup>, Jonathan A. Hill<sup>4</sup>, Sergei I. Grivennikov<sup>2, 11,\*</sup>, Ekaterina K. Koltsova<sup>1, 2, 12,\*</sup>

<sup>1</sup> Blood Cell Development and Function Program, Fox Chase Cancer Center, Philadelphia, PA 19111, USA

<sup>2</sup> Cedars-Sinai Medical Center, Cedars-Sinai Cancer Institute, Department of Medicine, Department of Biomedical Sciences 8700 Beverly Blvd, Los Angeles, CA, 90048

<sup>3</sup> Laboratory of Integrative Cancer Immunology, Center for Cancer Research, National Cancer Institute, National Institutes of Health, Bethesda, MD, USA, 20892

<sup>4</sup> Surface Oncology Inc., 50 Hampshire St. Cambridge, MA, 02139

<sup>5</sup> Laboratory of Human Carcinogenesis, Center for Cancer Research, National Cancer Institute, National Institutes of Health, Bethesda, MD, USA, 20892

<sup>6</sup> Liver Cancer Program, Center for Cancer Research, National Cancer Institute, National Institutes of Health, Bethesda, MD, USA, 20892

<sup>7</sup> Centre Hospitalier de l'Université de Montréal Research Center, Montreal, Quebec, Canada

<sup>8</sup> Molecular Therapeutics Program, Fox Chase Cancer Center, Philadelphia, PA, 19111, USA

<sup>9</sup> Genomics Facility, Fox Chase Cancer Center, Philadelphia, PA 19111, USA

<sup>10</sup> Bioinformatics Facility, The Wistar Institute, Philadelphia, PA 19104, USA

<sup>11</sup> Cancer Prevention and Control Program, Fox Chase Cancer Center, Philadelphia, PA, 19111, USA

<sup>12</sup> Corresponding and Lead Author, contact: Ekaterina Koltsova, MD, PhD, Department of Medicine, Department of Biomedical Sciences, Cedars-Sinai Medical Center, 8700 Beverly Blvd, Los Angeles, CA, 90048, USA., phone: +1-310-423-8899, E-mail: [Ekaterina.Koltsova@cshs.org](mailto:Ekaterina.Koltsova@cshs.org)

# these first authors equally contributed to this work

• these senior authors equally contributed to this work

Running title: IL-27R suppresses anti-cancer innate cytotoxic cells in HCC

K.F.W, M.R., R.M. and J.A.H. are either current or former employees and stockholders of Surface Oncology, Inc. J.S. received research funding and is a scientific advisor and stockholder of Surface Oncology. E.K.K. received research funding from Surface Oncology to investigate IL-27 blockade in HCC. J.A.H., M.R., K.F.W. and E.K.K. are inventors on pending patent applications associated with the topic presented in this article. Other authors declare no potential conflicts of interest.

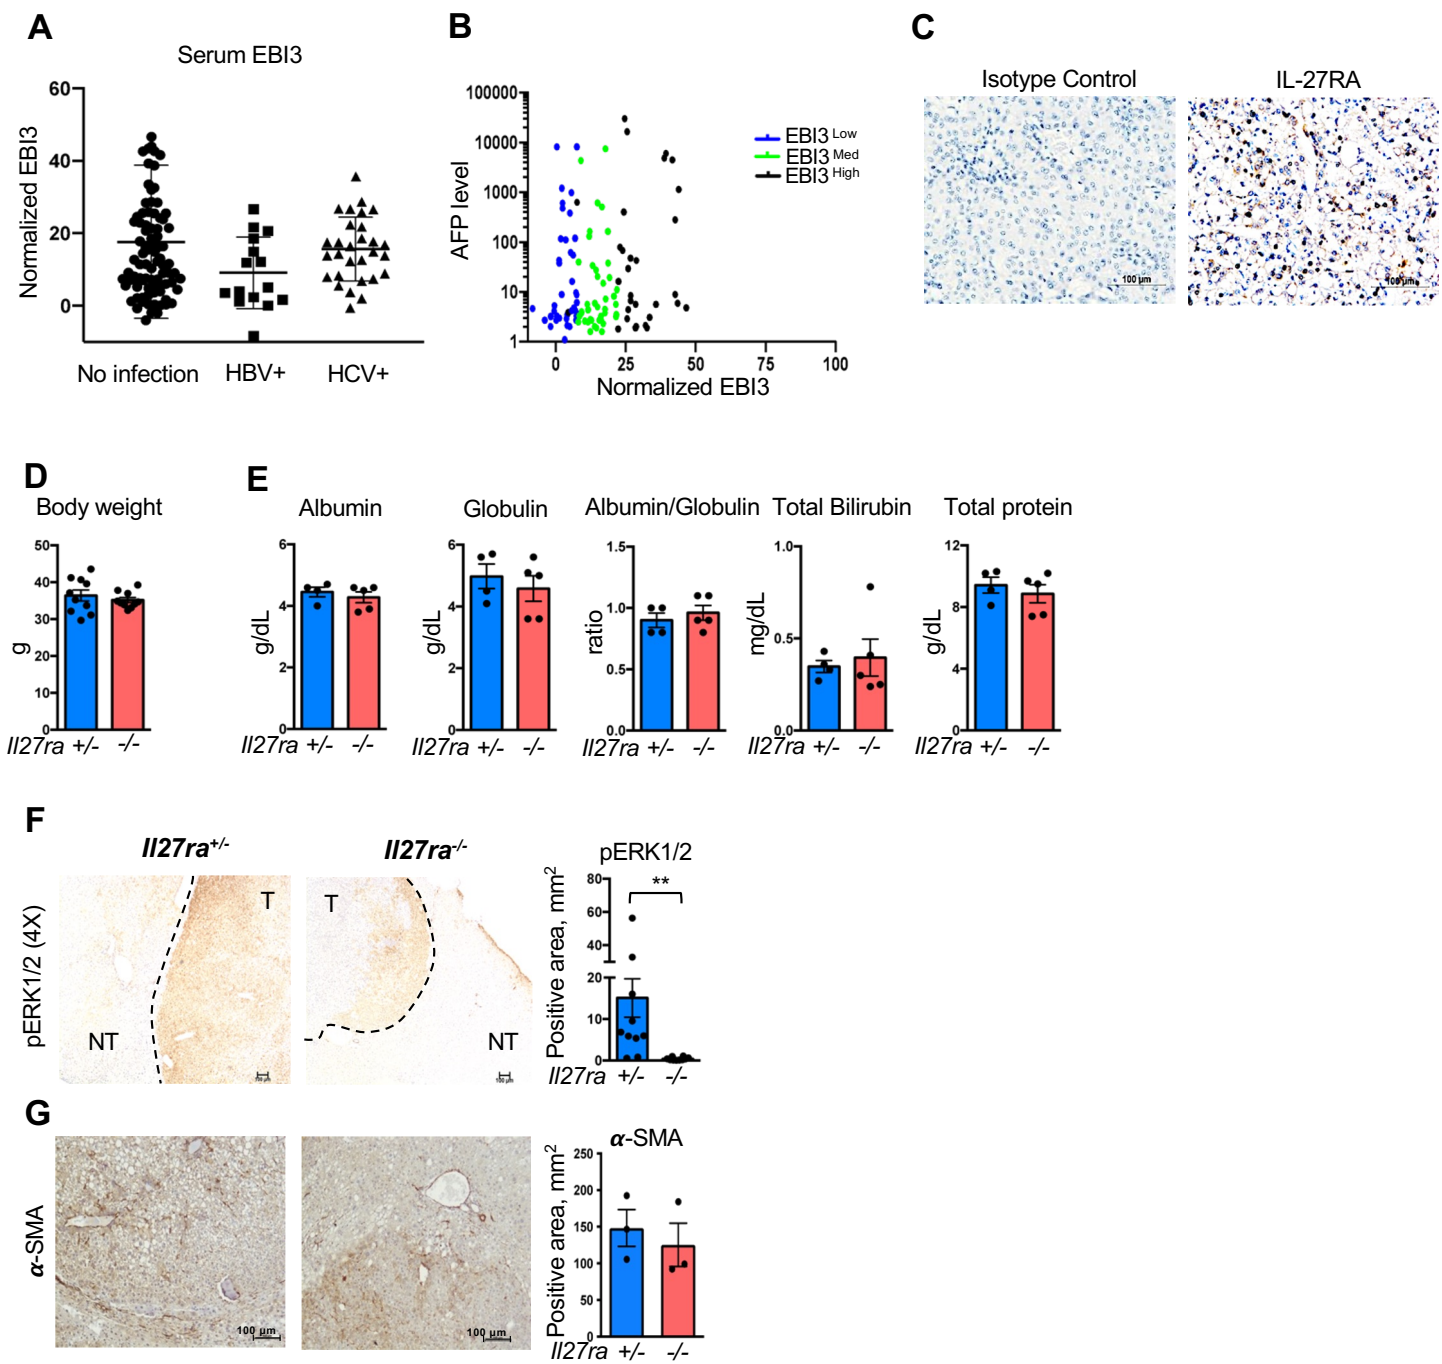

### Supplementary Figure S1. IL27R signaling is implicated in the regulation of HCC.

**A**, ELISA analysis of serum IL27EBI3 levels in HCC patients grouped by viral infections status. HBV<sup>+</sup>-hepatitis B virus positive; HCV<sup>+</sup>-hepatitis C virus positive. Note that HCV<sup>+</sup> patients showed higher serum EBI3 levels compared to HBV<sup>+</sup> patients ( $p=0.03$ ), however no differences were observed when comparing with the “no infection” patients. **B**, No correlation between serum AFP and EBI3 levels in the CHUM HCC patient cohort. **C**, Representative images of IHC staining for IL-27RA expression in human HCC. **D**, Body weight of DEN-injected tumor-bearing *Il27ra*<sup>+/+</sup> ( $n=10$ ) and *Il27ra*<sup>-/-</sup> ( $n=10$ ) male mice. **E**, Circulating proteins in serum of DEN-injected tumor-bearing *Il27ra*<sup>+/+</sup> ( $n=4$ ) and *Il27ra*<sup>-/-</sup> ( $n=5$ ) male mice. **F,G**, Representative images and quantification of IHC staining for p-ERK1/2 (**F**) and  $\alpha$ -SMA (**G**) on sections of HCC-bearing livers from DEN-injected *Il27ra*<sup>+/+</sup> ( $n=3-12$ ) and *Il27ra*<sup>-/-</sup> ( $n=3-10$ ) mice. Data are mean  $\pm$  SEM. \*\*  $p<0.01$ .

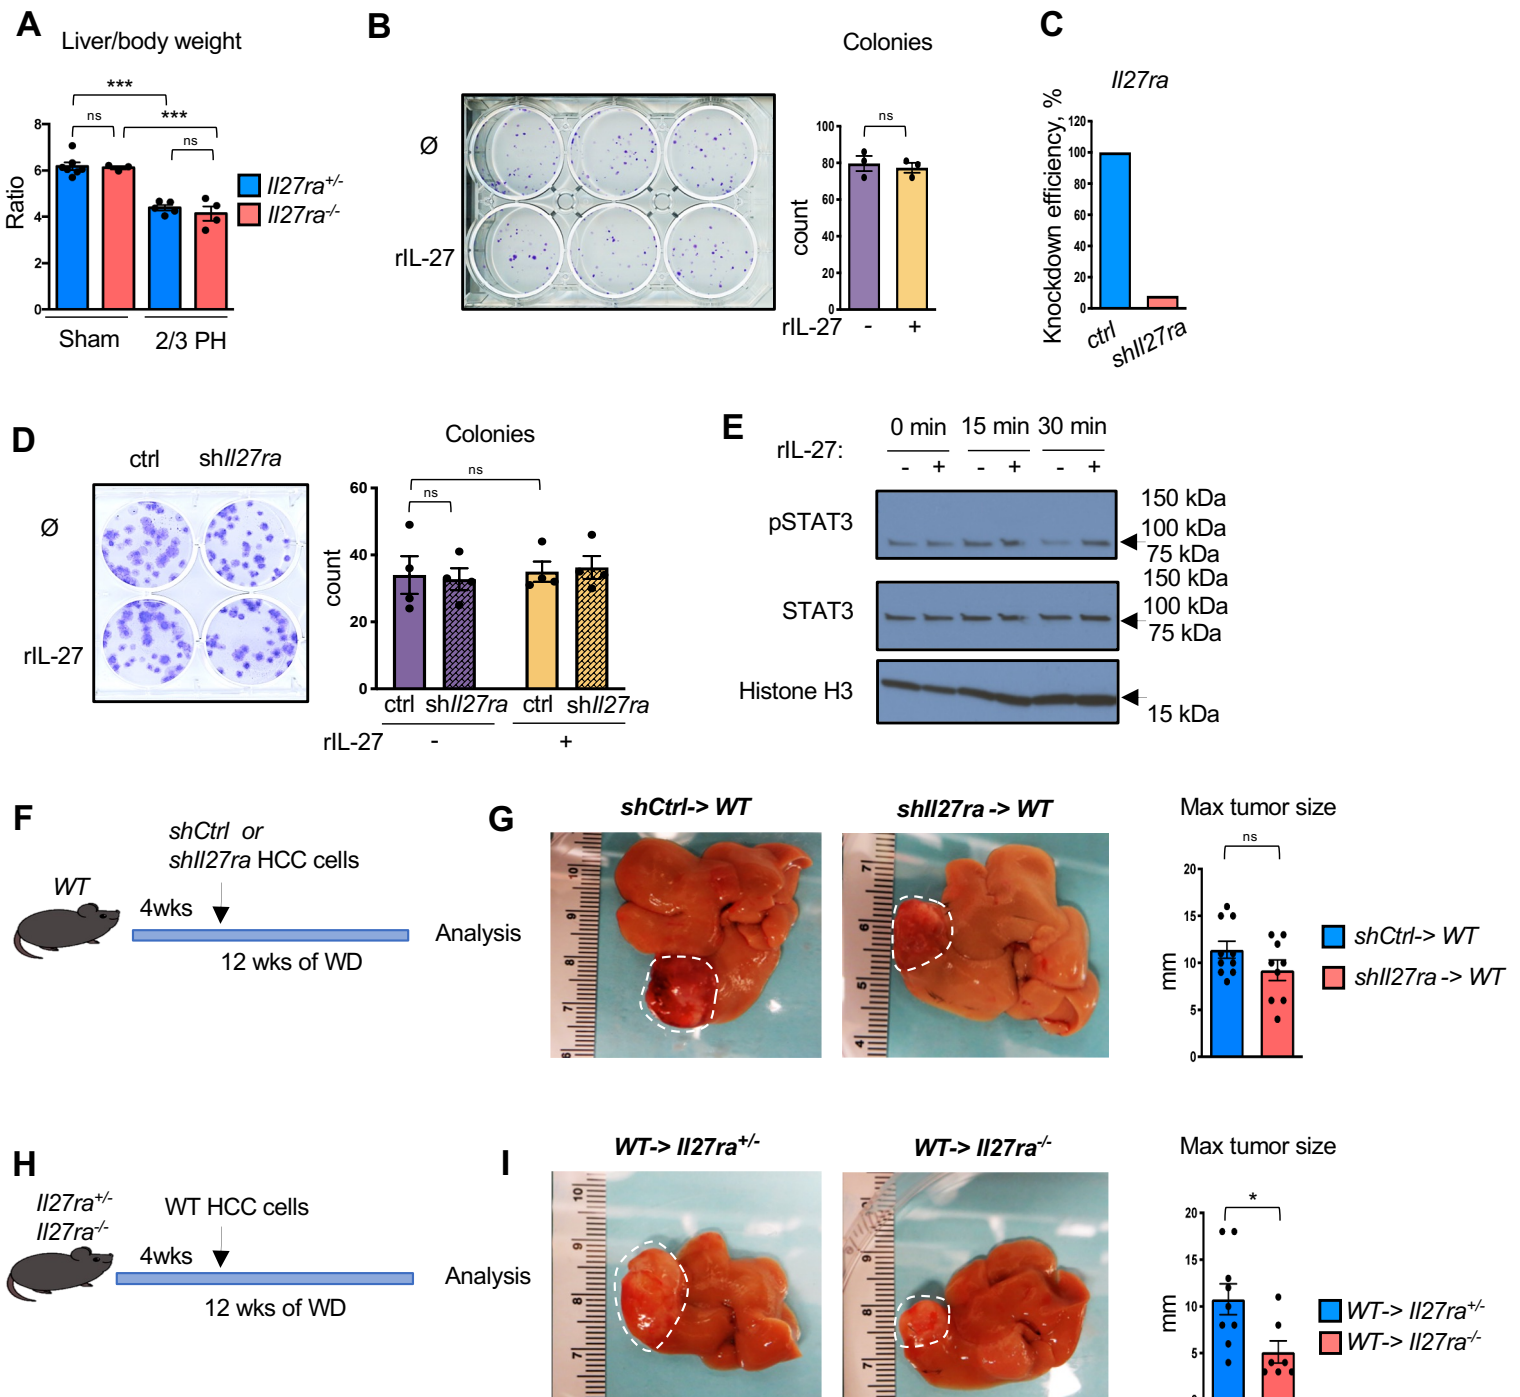

### Supplementary Figure S2. IL27R on hepatocytes or HCC cells does not affect cell proliferation.

**A**, Liver to body weight ratio of *Il27ra*<sup>+/-</sup> (n=7) and *Il27ra*<sup>-/-</sup> (n=3) and *Il27ra*<sup>+/-</sup> (n=5) and *Il27ra*<sup>-/-</sup> (n=4) male mice subjected to 2/3 partial hepatectomy (PH) or sham surgery. **B**, Representative image and quantification of the colonies of DEN-derived HCC cells stimulated *in vitro* with rIL27. **C**, Efficiency of *Il27ra* knockdown by shRNA as determined by Q-RT-PCR. **D**, Representative image and quantification of the colonies of DEN-derived HCC cells with or without knockdown of *Il27ra*, which were stimulated *in vitro* with rIL27. Data are mean  $\pm$  SEM from at least 2 independent experiments. **E**, Western blot analysis of phospho-STAT3 and STAT3 protein expression in DEN-derived HCC cells treated with rIL27 *in vitro* for 0, 15 min or 30 min. **F**, Scheme of experiment. HCC cells with or without knockdown of *Il27ra* were orthotopically transplanted to livers of C57BL/6 mice fed with WD. **G** Macroscopic images of liver tumors and quantification of maximum tumor sizes. **H**, Scheme of experiment. IL27R sufficient HCC cells were orthotopically transplanted to livers of *Il27ra*<sup>+/-</sup> or *Il27ra*<sup>-/-</sup> mice fed with WD. **I**, Macroscopic images of liver tumors and quantification of maximum tumor sizes. Data are mean  $\pm$  SEM from at least 3 independent experiments. \*\*\*p<0.001, \*p<0.05. Tukey's multiple comparisons test (**A**, **D**).

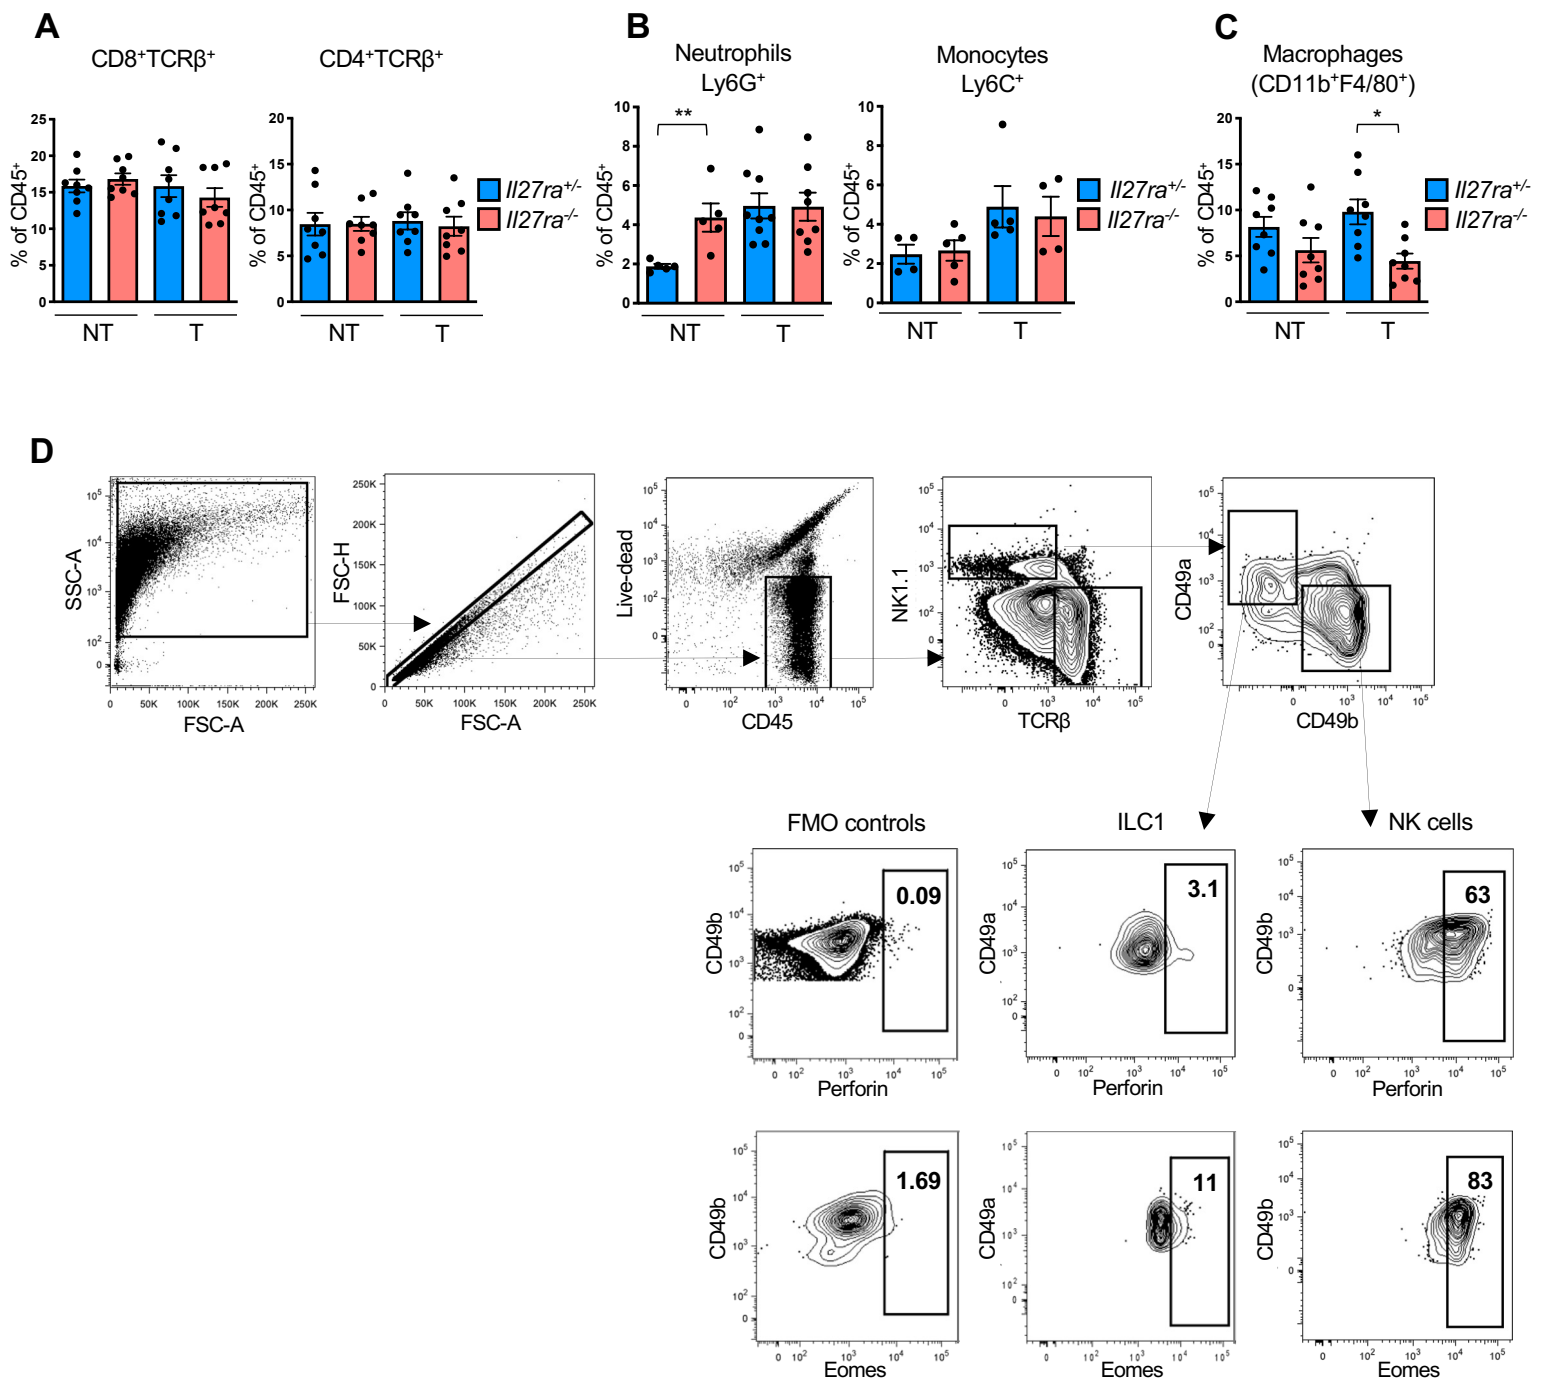

**Supplementary Figure S3. The role of IL27R in the regulation of immune tumor microenvironment in HCC.** FACS analysis of immune cells infiltrating non-tumor (NT) and tumor (T) tissues of DEN- treated *Il27ra*<sup>+/+</sup> and *Il27ra*<sup>-/-</sup> mice. Percentage of (A) CD8<sup>+</sup>TCRβ<sup>+</sup> and CD4<sup>+</sup>TCRβ<sup>+</sup> cells, (B) Ly6G<sup>+</sup> (neutrophils) and Ly6C<sup>+</sup> (inflammatory monocytes), (C) F4/80<sup>+</sup> macrophages are shown (n=4-9). Data are mean ± SEM from at least 3 independent experiments from DEN injected, tumor bearing 10-month-old mice. D, Gating strategy to define and characterize NK versus ILC1 cells within NK1.1<sup>+</sup> TCRβ<sup>-</sup> population.

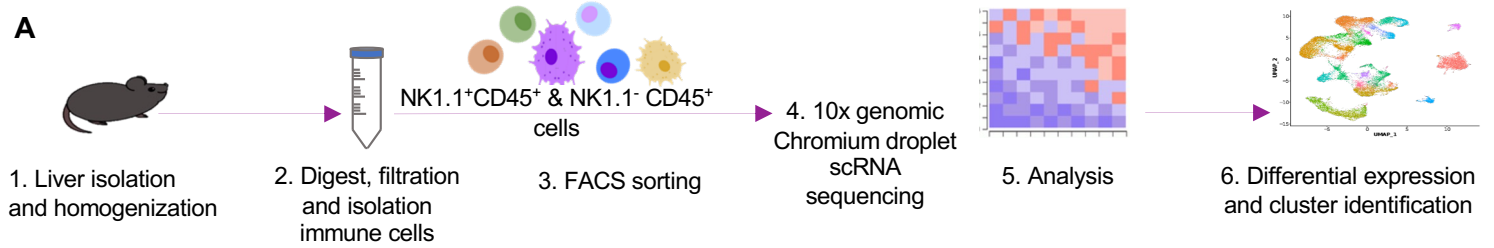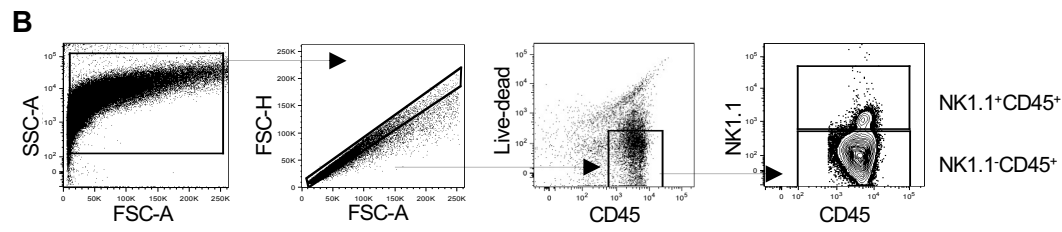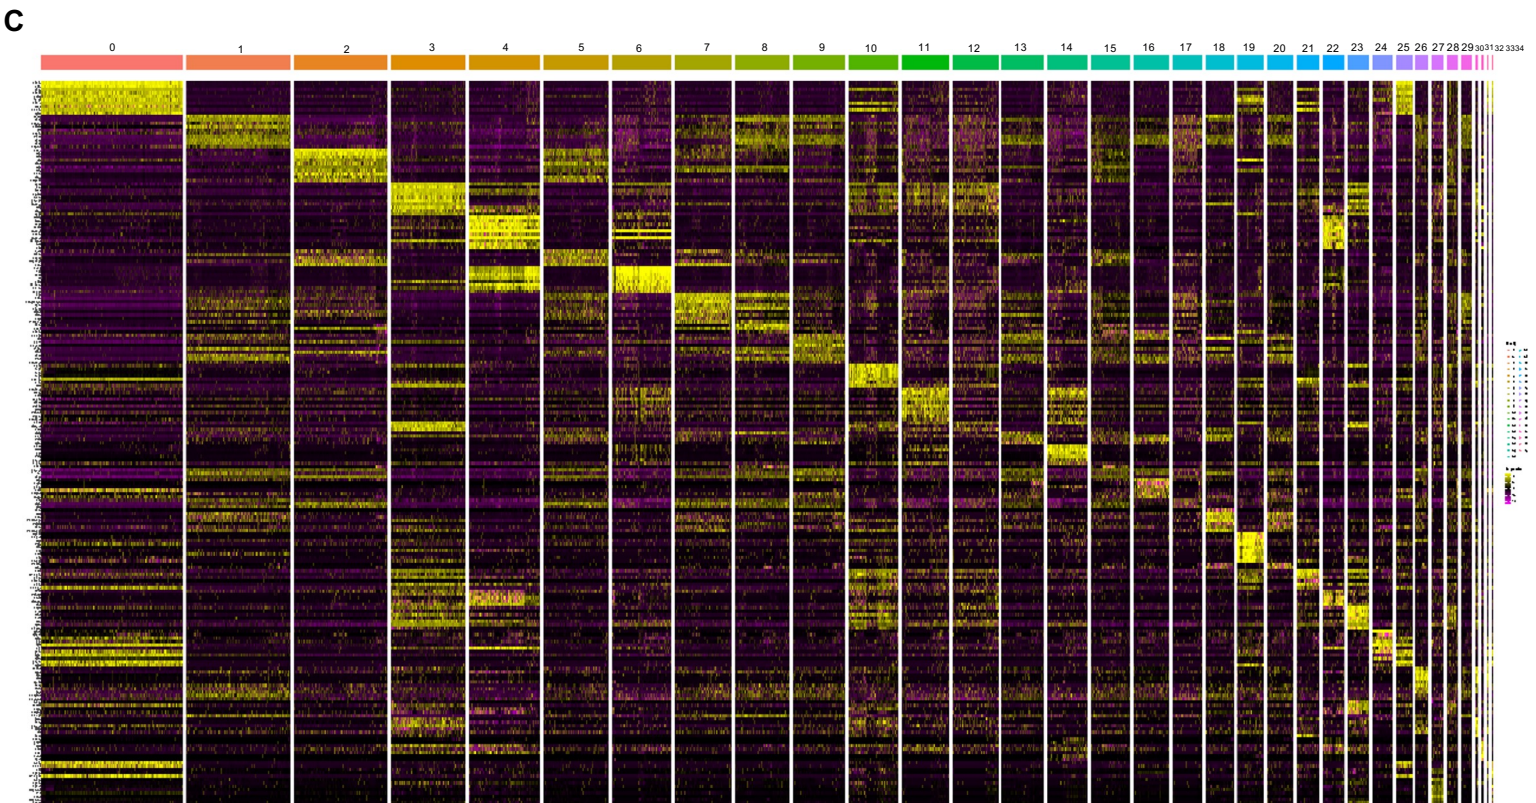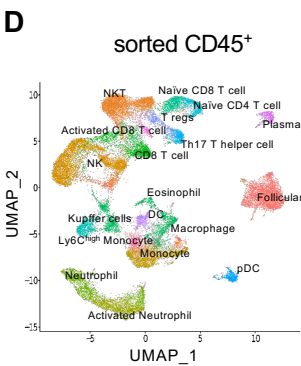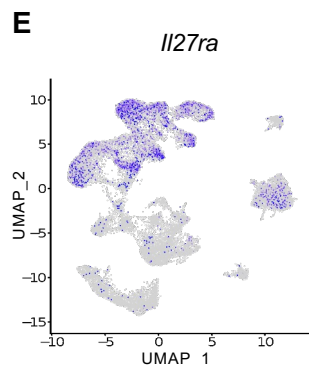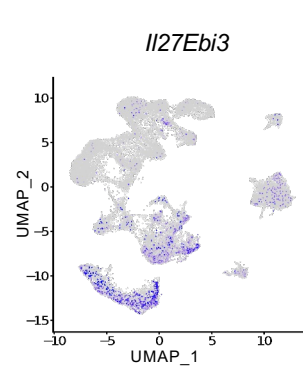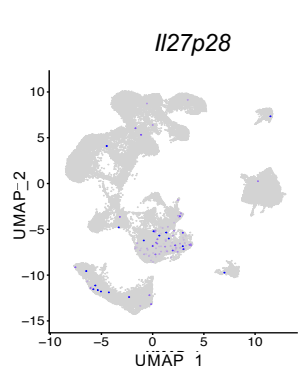

**Supplementary Figure S4. Single cell RNA sequencing analysis of HCC-infiltrating immune cells.**

**A**, Scheme of scRNA seq pipeline to analyze CD45<sup>+</sup> immune cells in non-tumor (NT) and tumor (T) tissues of DEN-treated *I127ra*<sup>+/-</sup> and *I127ra*<sup>-/-</sup> mice. **B**, Gating strategy for FACS sorting of CD45<sup>+</sup>NK1.1<sup>+</sup> and CD45<sup>+</sup>NK1.1<sup>-</sup> cells. **C**, Heatmap overview of significantly differentially expressed genes which define various clusters of CD45<sup>+</sup> cells using Seurat. **D**, UMAP plot of 41772 pooled mouse CD45<sup>+</sup>NK1.1<sup>+</sup> and CD45<sup>+</sup>NK1.1<sup>-</sup> cells isolated from NT and T tissues of DEN-treated *I127ra*<sup>+/-</sup> and *I127ra*<sup>-/-</sup> mice and subjected to 10x Genomics single cell droplet scRNA sequencing. Cluster analysis yields 34 distinct clusters and 19 immune cell types. **E**, UMAP plot shows cell type specific expression pattern for *I127ra*, *I127Ebi3*, *I127p28* among clusters.

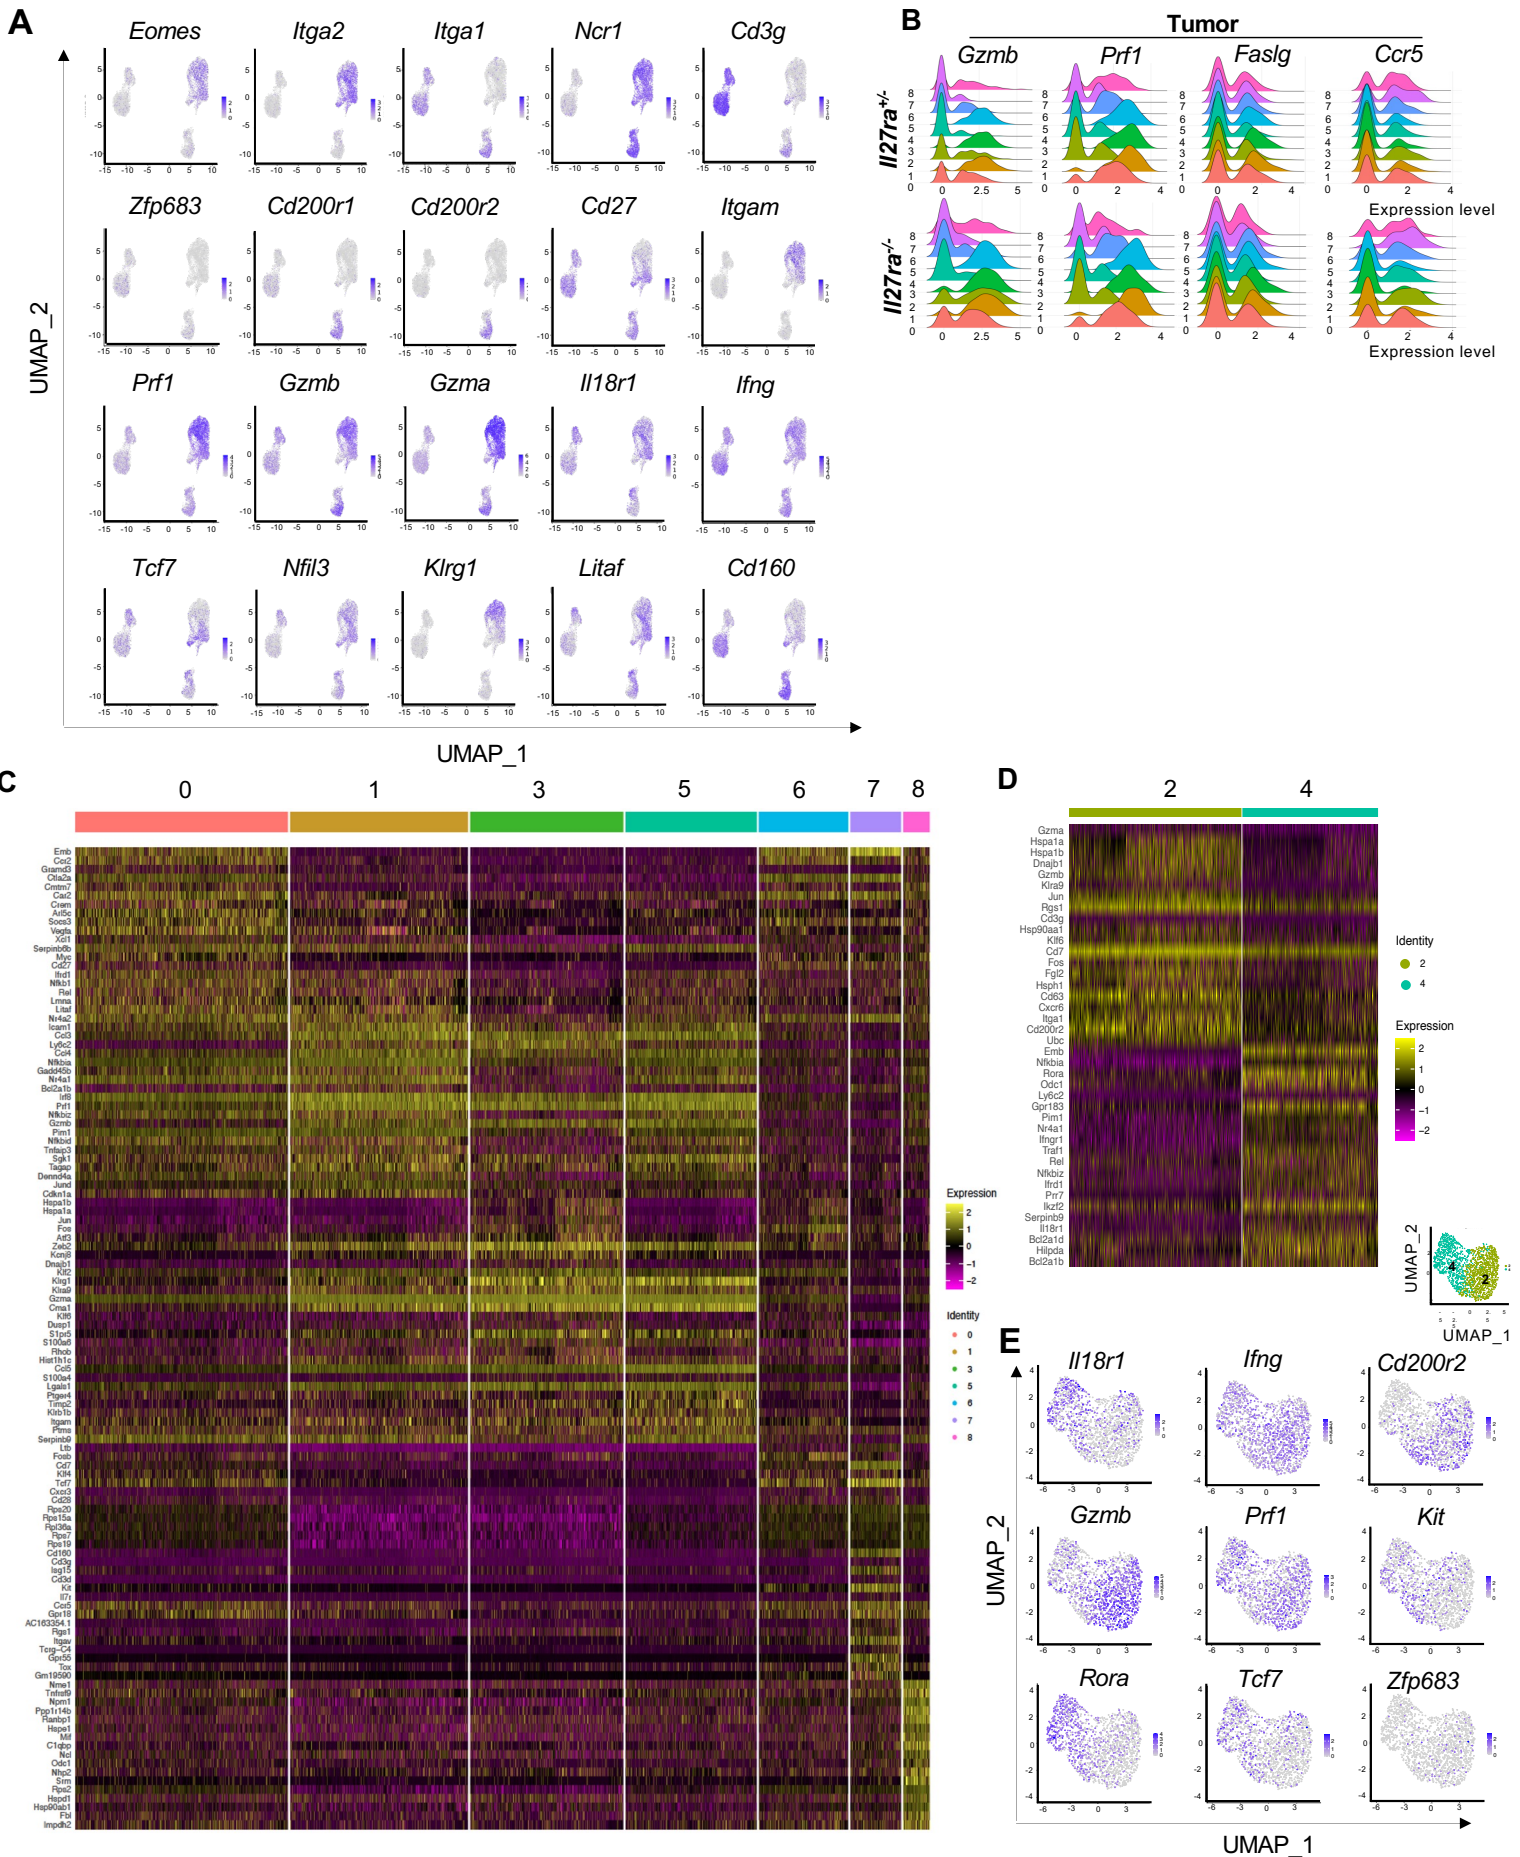

Supplementary Figure S5

**Supplementary Figure S5. Single cell RNA sequencing analysis of NK1.1<sup>+</sup> cells.**

**A**, UMAP plots for selected genes for NK, ILC1 and NKT cells among sorted CD45<sup>+</sup>NK1.1<sup>+</sup> cells (see also Fig. 3C). **B**, Ridge plot visualization for the expression of selected cytotoxicity and recruitment markers among NK and ILC1 clusters. **C,D**, Heatmap of differentially expressed genes which define NK clusters (**C**) and ILC1 clusters (**D**) depicted on **Fig. 3F** and **3K**, respectively. **(E)** Selected UMAP feature plots showing RNA expression of additional cluster markers for ILC1 clusters.



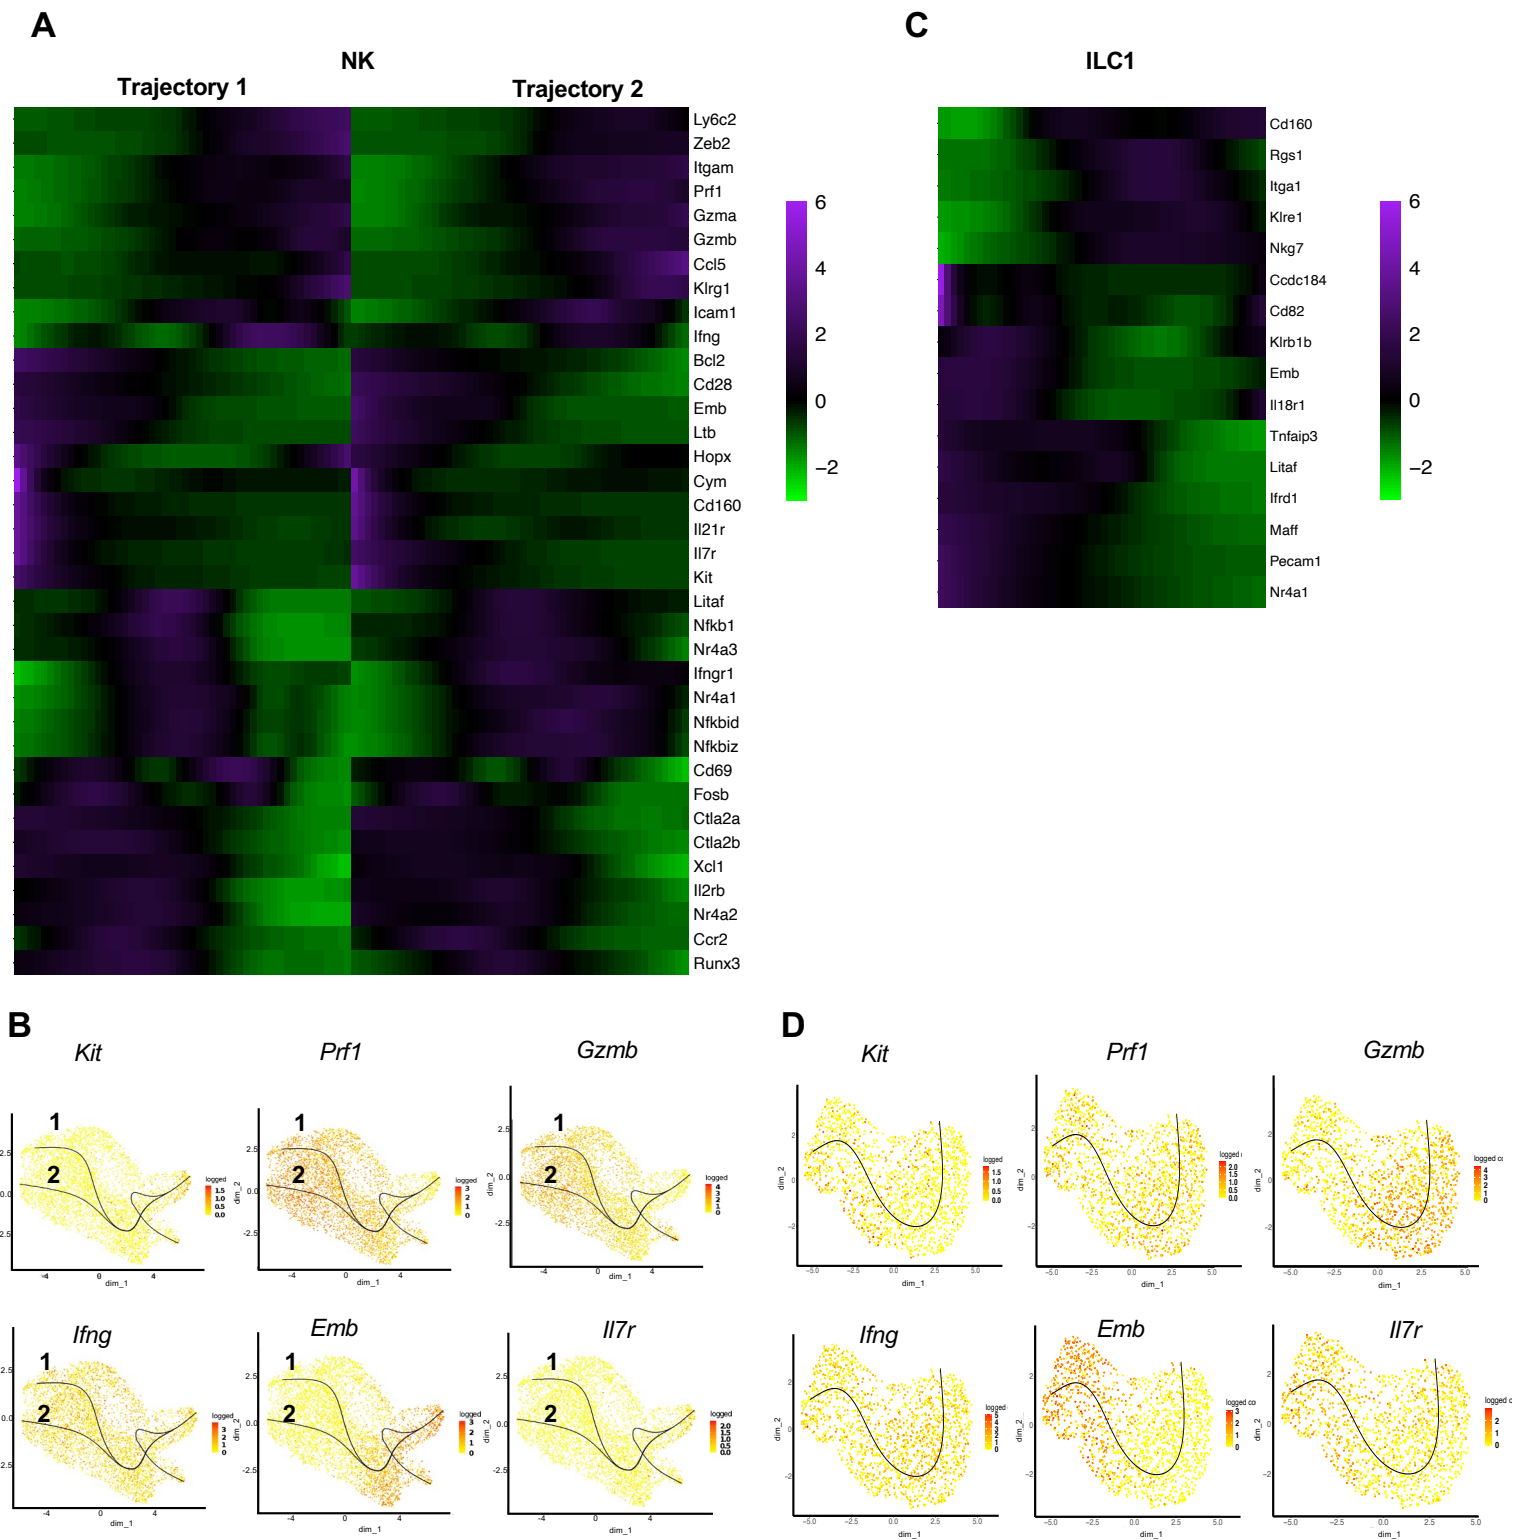

**Supplementary Figure S6. Differential gene expression during NK and ILC1 differentiation regulated by IL27R.** **A**, Heatmap of enriched genes for NK trajectories shown on **Fig 3F**. **B**, UMAP plots visualizing gene expression of selected genes along the trajectories of NK cell differentiation. **C**, Heatmap of enriched genes for ILC1 trajectory shown on **Fig 3K**. **D**, UMAP plots visualizing gene expression of selected genes along the trajectories ILC1 differentiation. Color indicates increased (violet) or decreased (green) expression.

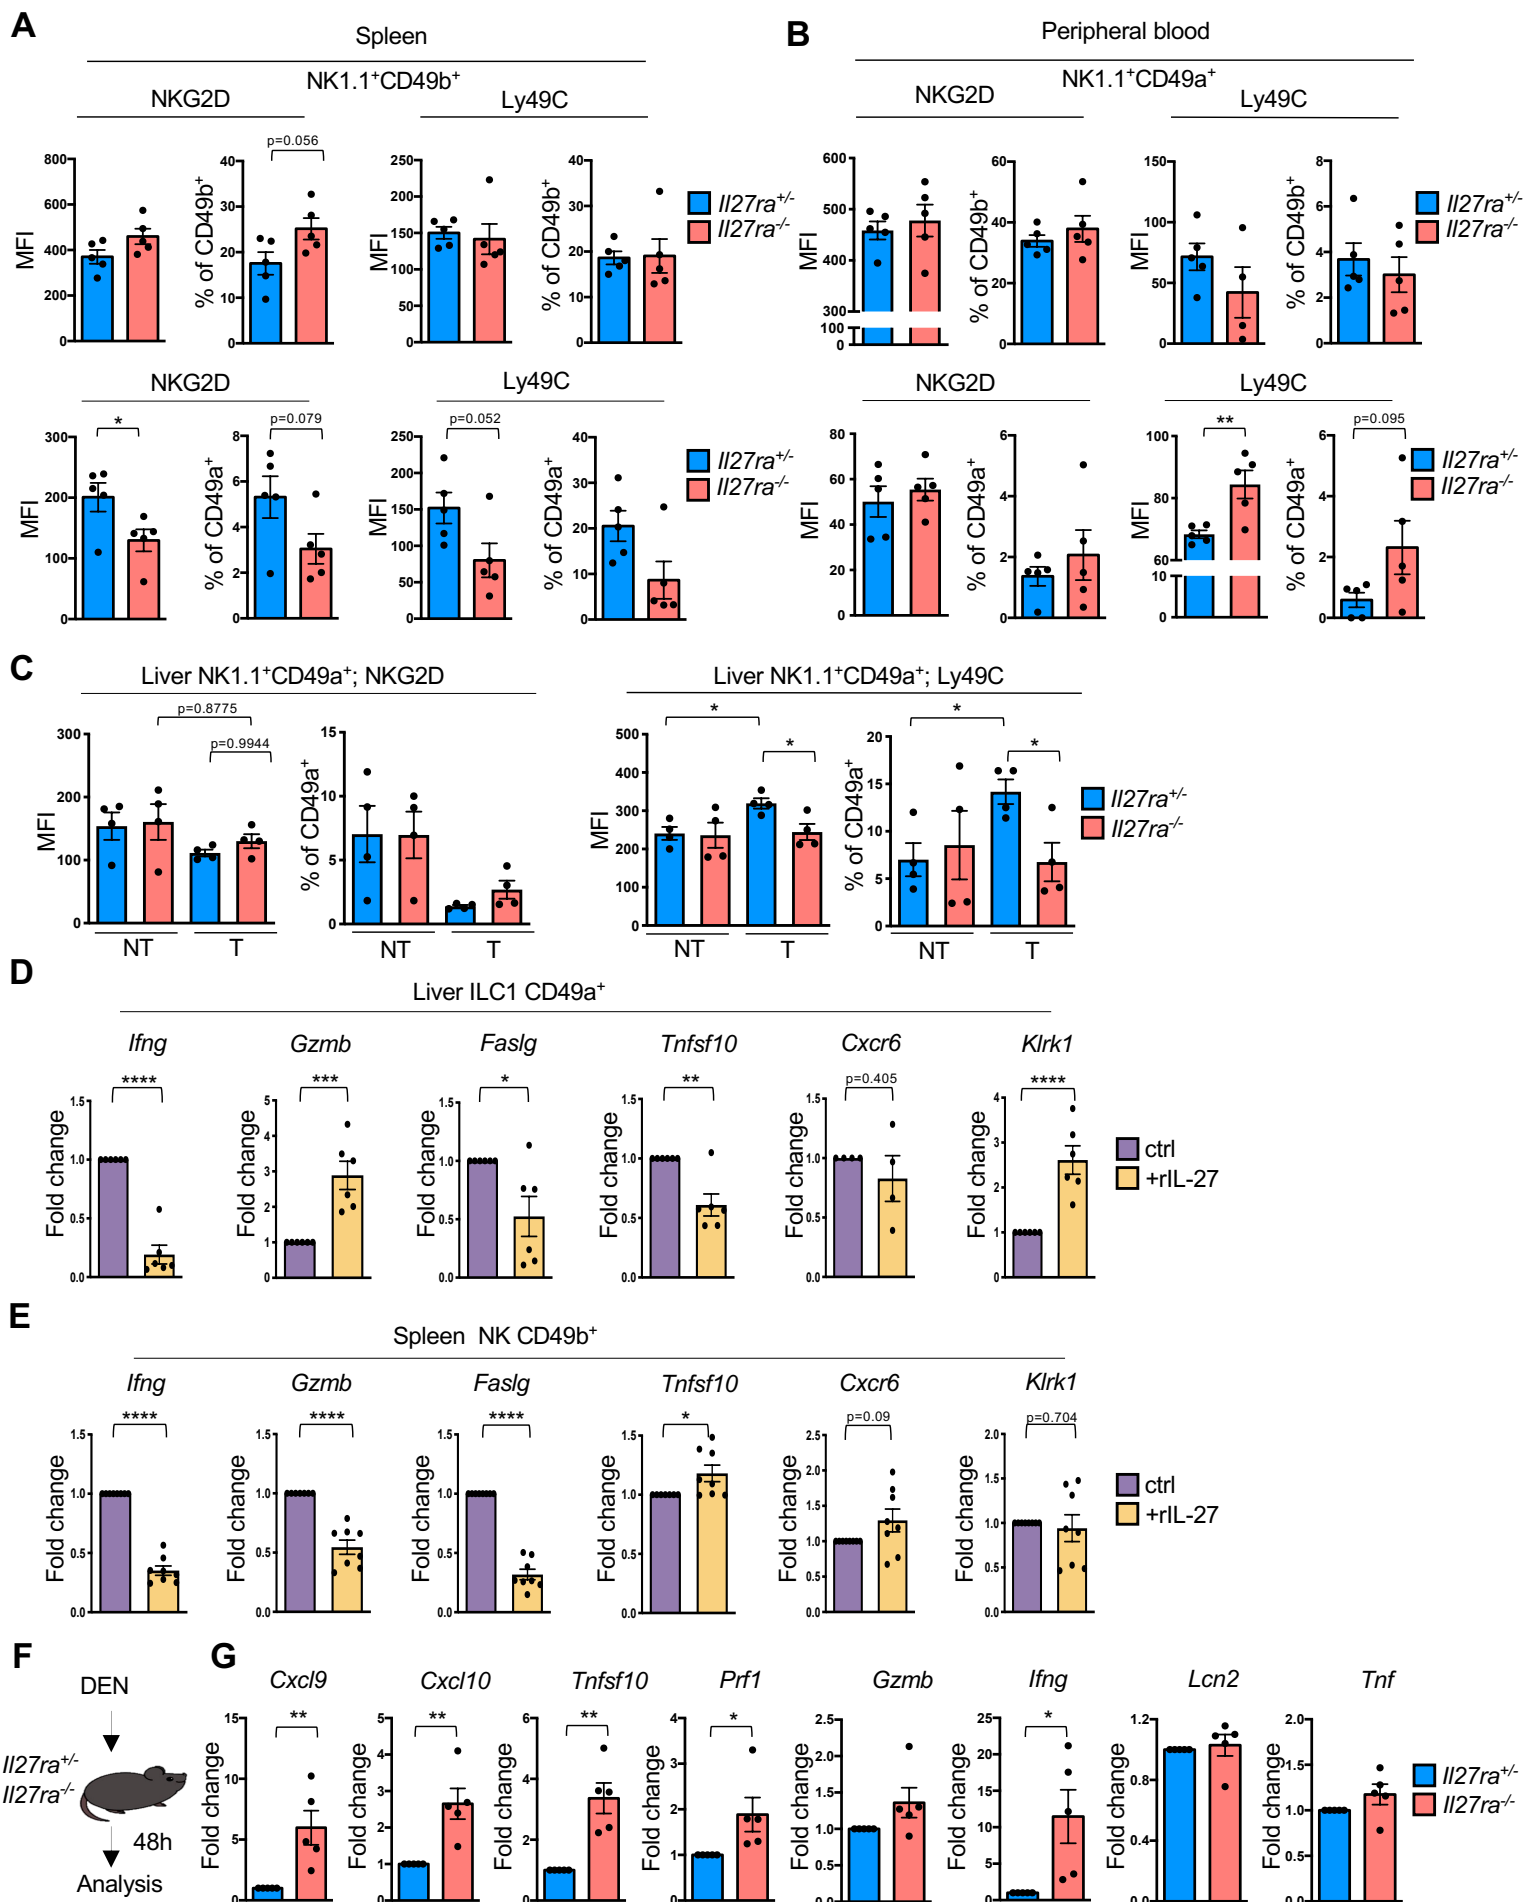

Supplementary Figure S7

**Supplementary Figure S7. Role of IL27R signaling in the regulation of innate cytotoxic cells activity and response.** Single cell suspensions of spleen, liver or peripheral blood from DEN-treated *Il27ra*<sup>+/-</sup> (n=4-5) and *Il27ra*<sup>-/-</sup> (n=4-5) 10-month-old mice were stained for Live/Dead, CD45, TCR $\beta$ , NK1.1, CD49a, CD49b, NKG2D, Ly49C and analyzed by FACS. Mean fluorescence intensity (MFI) and percentage of positive cells for NKG2D and Ly49C expression on NK1.1<sup>+</sup>TCR $\beta$ -CD49b<sup>+</sup> NK and NK1.1<sup>+</sup>TCR $\beta$ -CD49a<sup>+</sup> ILC1 cells in spleens (**A**) and peripheral blood (**B**). **C**, MFI of expression for NKG2D and Ly49C and percentage of positive cells among NK1.1<sup>+</sup> TCR $\beta$ -CD49a<sup>+</sup> liver ILC1 cells. **D,E**, Q-RT-PCR analysis of relative gene expression of cytotoxic genes in liver CD49a<sup>+</sup> ILC1 cells (**D**) or splenic CD49b<sup>+</sup> NK cells (**E**) stimulated *in vitro* with rIL27 (n=4-8). Gene expression was normalized to *Rpl32*, and then to the gene expression in control. Data are mean  $\pm$  SEM from at least 3 independent experiments. **F**, Scheme of the experiment. 8-week-old *Il27ra*<sup>+/-</sup> and *Il27ra*<sup>-/-</sup> male mice were injected with 100 mg/kg of DEN. Inflammatory gene expression in livers was analyzed 48h later by Q-RT-PCR. **G**, Relative gene expression of chemokines, cytokines and cytotoxic molecules in livers of *Il27ra*<sup>+/-</sup> (n=5) and *Il27ra*<sup>-/-</sup> (n=5) male mice. Gene expression was first normalized to *Rpl32* then to gene expression in liver of *Il27ra*<sup>+/-</sup> mice. Data are mean  $\pm$  SEM from at least 3 independent experiments. \*p<0.05, \*\*p<0.01, unpaired Student's t-test (two-tailed).

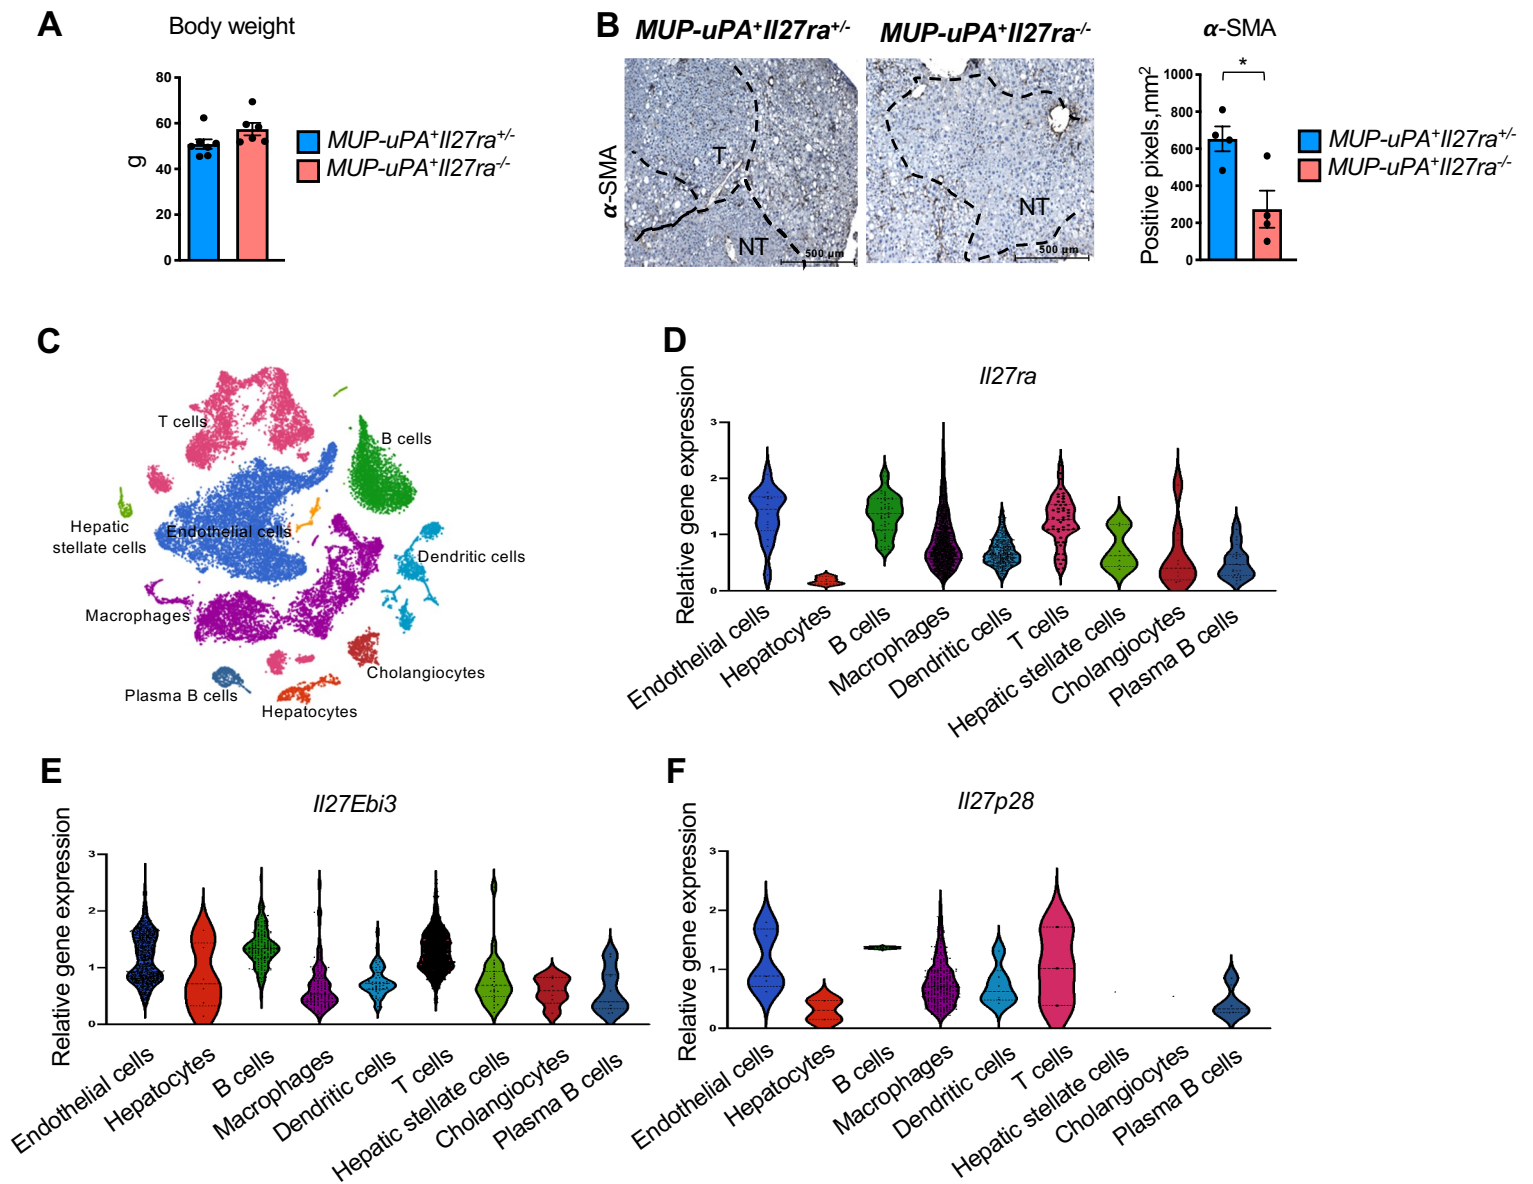

### Supplementary Figure S8. IL27R in NASH and NASH-driven HCC.

**A**, Body weight of WD-fed tumor-bearing mice *MUP-uPA+Il27ra+/-* (n=7) and *MUP-uPA+Il27ra-/-* (n=6) male mice. **B**, Representative images and quantification of  $\alpha$ -SMA staining of HCC sections from *MUP-uPA+Il27ra+/-* and *MUP-uPA+Il27ra-/-* mice (n=4). Data are mean  $\pm$  SEM from at least 3 independent experiments. **C-F**, 10x Genomics-based platform single cell RNA sequencing of cells from livers of mice on regular or NASH-inducing diet (dataset GSE129516)(84). Analysis was performed using BBrowser software. **C**, UMAP plot representing cell clusterization. **D-F**, Violin plot representing cell type specific expression of *Il27ra*, *Il27Ebi3*, *Il27p28* in identified clusters.

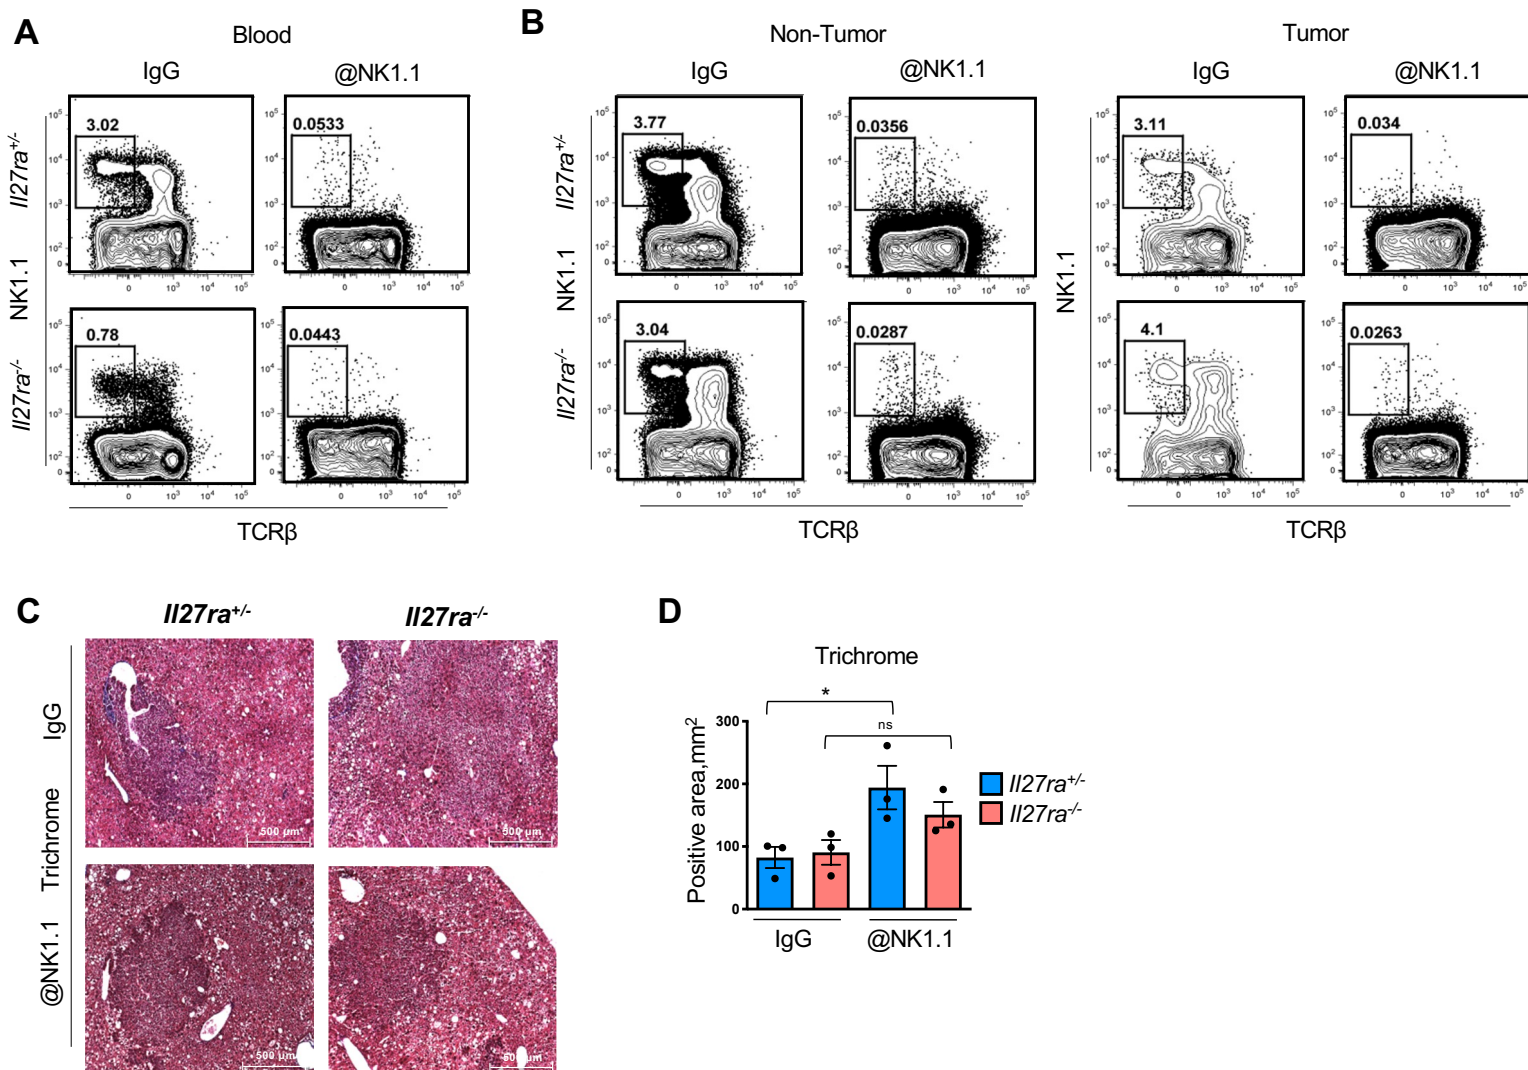

### Supplementary Figure S9. Depletion of NK1.1 cells in DEN-driven HCC.

Representative FACS plots of NK cell depletion efficiency in blood (**A**) and non-tumor and tumor tissue (**B**) from DEN-driven tumor bearing *I127ra*<sup>+/-</sup> and *I127ra*<sup>-/-</sup> male mice which received anti-NK1.1 or isotype control antibody. Representative images (**C**) and quantification of fibrosis (**D**) as determined by Trichrome staining of liver sections from DEN-driven tumor bearing *I127ra*<sup>+/-</sup> (n=3) and *I127ra*<sup>-/-</sup> (n=3) mice received anti-NK1.1 or isotype control antibody.

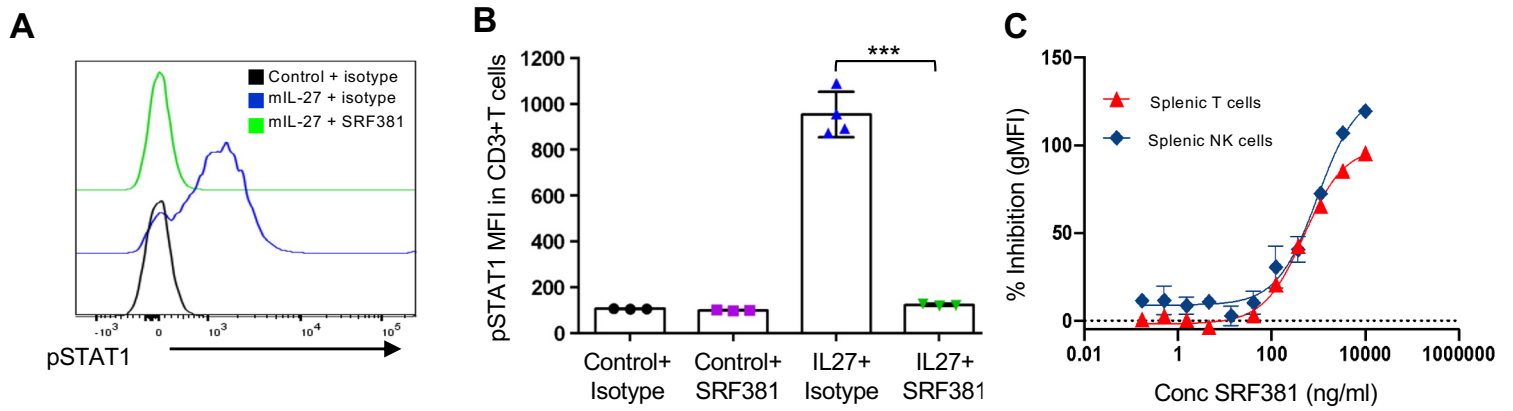

**Supplementary Figure S10. Anti-IL27 (SRF381) inhibits IL27-induced phosphorylation of STAT1 in T cells and NK cells.** **A,B,** Mice were injected with empty vector (control) or murine IL27 (mIL27) minicircles to induce ectopic IL27 expression by hydrodynamic transfection. Five days after transfection mice were treated I.P. with 1 mg of either SRF381 or IgG isotype control antibody. Whole blood was collected 24 h after antibody treatment and plasma was prepared. Plasma from antibody treated, minicircle-expressing mice was incubated for 30 min *in vitro* with splenocytes from naïve mice. Cells were then fixed and permeabilized for pSTAT1 staining. Flow cytometry analysis was used to detect pSTAT1 in CD3<sup>+</sup> T cells. **C,** Splenocytes from naïve mice were incubated with recombinant murine IL27 (40 ng/ml) for 30 min *in vitro* in the presence or absence of varying concentrations of SRF381. Cells were stained for surface CD3 (T cells) or NK1.1<sup>+</sup> (NK cells), then fixed, permeabilized, stained for phospho-STAT1 and analyzed by FACS. Data were normalized to the geometric mean fluorescence intensity (gMFI) of IL27 stimulated vs unstimulated conditions, representing 0% and 100% inhibition, respectively.
